# Supplementary material for: Indentation Response of Calcium Aluminoborosilicate Glasses Subjected to Humid Aging and Hot Compression
Source: MDPI journal article supplement (doi:10.3390/ma14133450), 2021-06-22

# Indentation Response of Calcium Aluminoborosilicate Glasses Subjected to Humid Aging and Hot Compression

Xiangting Ren <sup>1</sup>, Pengfei Liu <sup>1</sup>, Sylwester J. Rzoska <sup>2</sup>, Boleslaw Lucznik <sup>2</sup>, Michal Bockowski <sup>2</sup> and Morten M. Smedskjaer <sup>1,\*</sup>

<sup>1</sup> Department of Chemistry and Bioscience, Aalborg University, 9220 Aalborg, Denmark; xiangtingr@bio.aau.dk (X.R.); pli@bio.aau.dk (P.L.)

<sup>2</sup> Institute of High-Pressure Physics, Polish Academy of Sciences, 01-142 Warsaw, Poland; sylwester.rzoska@gmail.com (S.J.R.); bolo@unipress.waw.pl (B.L.); bocian@unipress.waw.pl (M.B.)

\* Correspondence: mos@bio.aau.dk

**Citation:** Ren, X.; Liu, P.; Rzoska, S.J.; Lucznik, B.; Bockowski, M.; Smedskjaer, M.M. Indentation Response of Calcium Aluminoborosilicate Glasses Subjected to Humid Aging and Hot Compression. *Materials* **2021**, *14*, x. <https://doi.org/10.3390/xxxxx>

Academic Editor(s): Halina Kaczmarek

Received: date

Accepted: date

Published: date

**Publisher's Note:** MDPI stays neutral with regard to jurisdictional claims in published maps and institutional affiliations.

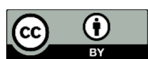

**Copyright:** © 2021 by the authors. Submitted for possible open access publication under the terms and conditions of the Creative Commons Attribution (CC BY) license (<http://creativecommons.org/licenses/by/4.0/>).

## Supporting information

**Table S1.** Overview of the properties of the pristine glasses, including glass transition temperature ( $T_g$ ), density ( $\rho$ ), Young's modulus ( $E$ ), shear modulus ( $G$ ), bulk modulus ( $B$ ), Poisson's ratio ( $\nu$ ), Vickers hardness ( $H_v$ ), and crack resistance ( $CR$ ).

| Glass ID  | $T_g$<br>[°C] | $\rho$<br>[g/cm <sup>3</sup> ] | $E$<br>[GPa] | $G$<br>[GPa] | $B$<br>[GPa] | $\nu$<br>[-] | $H_v^{(1)}$<br>[GPa] | $CR^{(2)}$<br>(Vickers)<br>[N] | $CR^{(2)}$<br>(cube)<br>[N] |
|-----------|---------------|--------------------------------|--------------|--------------|--------------|--------------|----------------------|--------------------------------|-----------------------------|
| CABS-ref  | 677           | 2.411                          | 67           | 26           | 47           | 0.260        | 5.82                 | 13.0                           | 0.5                         |
| CABS-SiB  | 652           | 2.424                          | 65           | 26           | 47           | 0.267        | 5.54                 | 13.6                           | 1.0                         |
| CABS-CaB  | 683           | 2.539                          | 73           | 28           | 55           | 0.275        | 5.62                 | 5.6                            | 0.8                         |
| CABS-BAl  | 636           | 2.395                          | 63           | 25           | 42           | 0.249        | 5.58                 | 18.9                           | 0.4                         |
| CABS-CaSi | 668           | 2.497                          | 72           | 28           | 51           | 0.261        | 5.81                 | 14.5                           | 0.5                         |
| CABS-CaAl | 665           | 2.499                          | 71           | 28           | 46           | 0.244        | 6.11                 | 8.2                            | 0.5                         |

(1)  $H_v$  measured at ambient conditions at load of 9.8 N (1 kgf).

(2)  $CR$  measured at ambient conditions (temperature 23.5±1 °C, relative humidity ~37%).

**Table S2.** Atomic packing density ( $C_g$ ) of the as-made, hot compressed, humid aged, and hot-compressed/humid-aged CABS glasses. Coloring indicates reference density (grey), increasing density relative to reference (green), and decreasing density relative to reference (red). The error in  $C_g$  is within  $\pm 0.001$ .

| Glass ID  | $C_{g \text{ as-made}}$ | $C_{g \text{ hot}}$ | $C_{g \text{ aging}}$ | $C_{g \text{ hot-aging}}$ |
|-----------|-------------------------|---------------------|-----------------------|---------------------------|
| CABS-ref  | 0.434                   | 0.461               | 0.438                 | 0.462                     |
| CABS-SiB  | 0.436                   | 0.459               | 0.433                 | 0.457                     |
| CABS-CaB  | 0.453                   | 0.470               | 0.454                 | 0.470                     |
| CABS-BAl  | 0.424                   | 0.445               | 0.423                 | 0.446                     |
| CABS-CaSi | 0.444                   | 0.470               | 0.446                 | 0.469                     |
| CABS-CaAl | 0.438                   | 0.456               | 0.439                 | 0.457                     |

**Figure S1.** X-ray diffraction spectra of the calcium aluminoborosilicate (CABS) glasses.

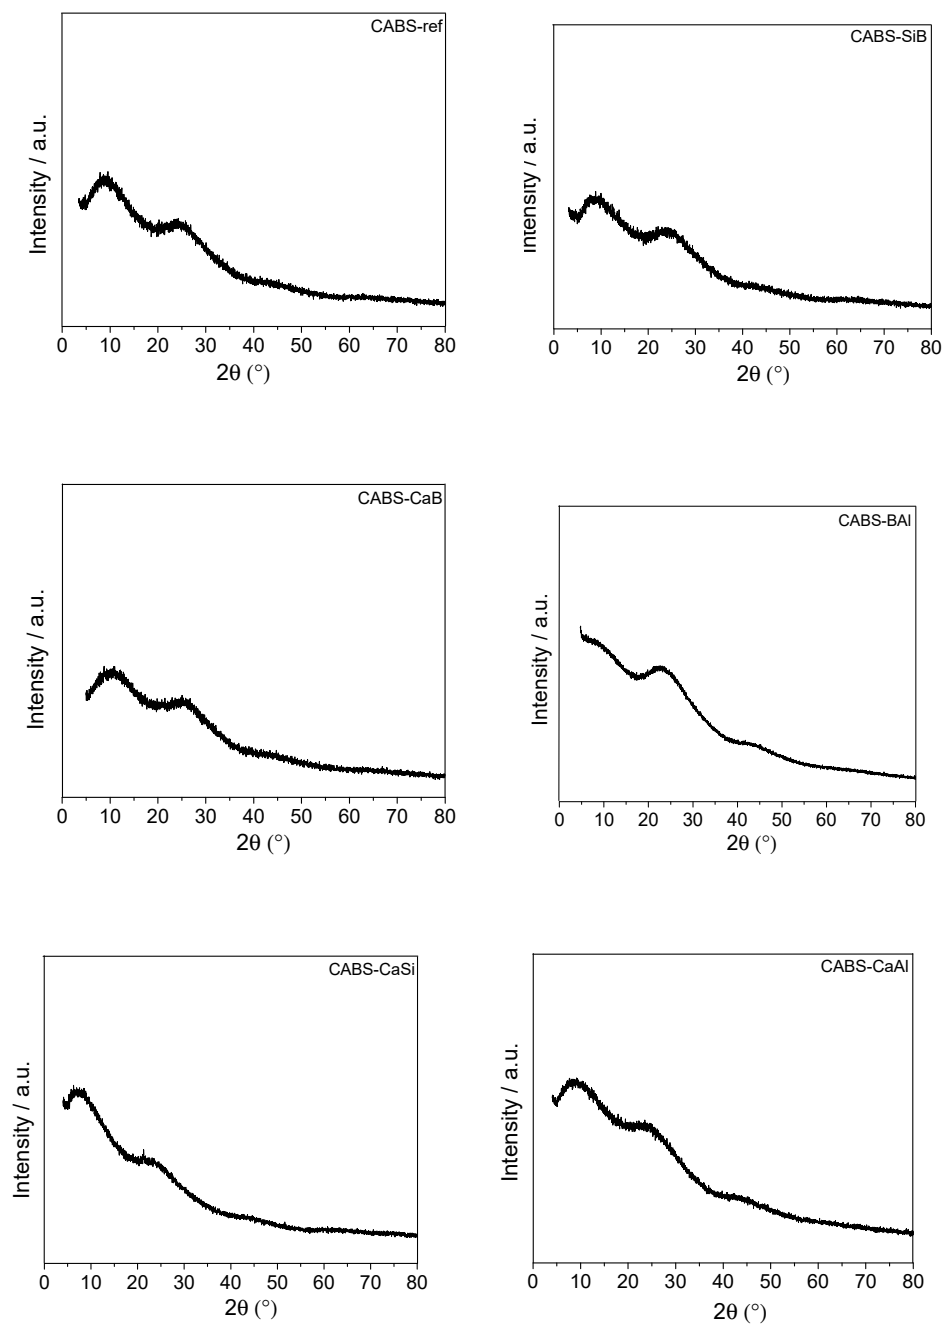

**Figure S2.** Crack probability as a function of applied indentation load for the calcium aluminoborosilicate (CABS) glasses. The experimental data was fit to a sigmoidal function of the form  $y = A_2 + (A_1 - A_2)/[1 + (x/x_0)^p]$  (solid lines).

a. CABS (Hot compression) – Vickers indenter

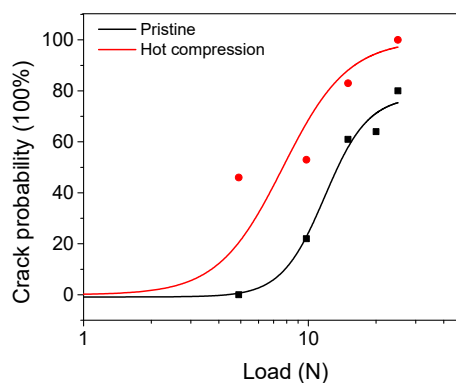

**CABS-ref**

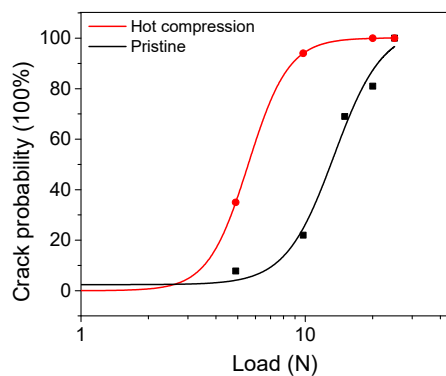

**CABS-SiB**

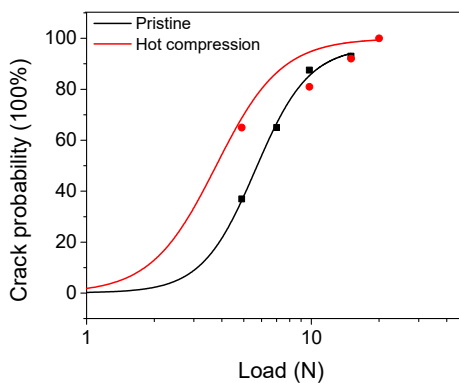

**CABS-CaB**

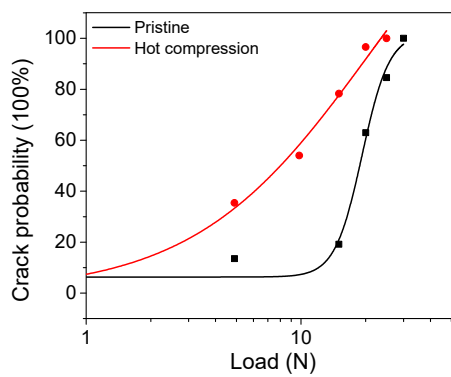

**CABS-BAl**

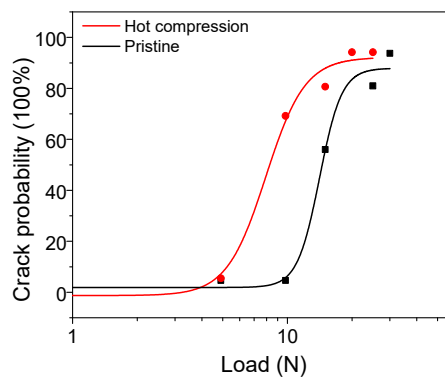

CABS-CaSi

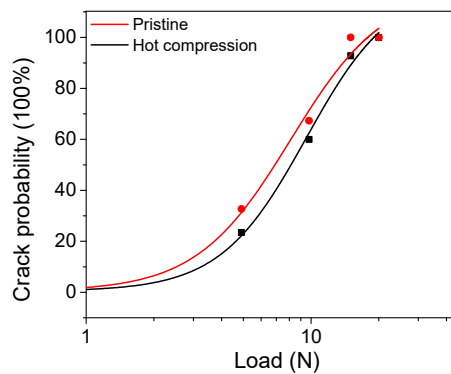

CABS-CaAl

b. CABS (Hot compression) – cube corner indenter

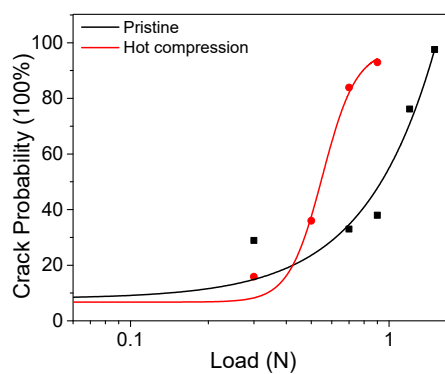

CABS-ref

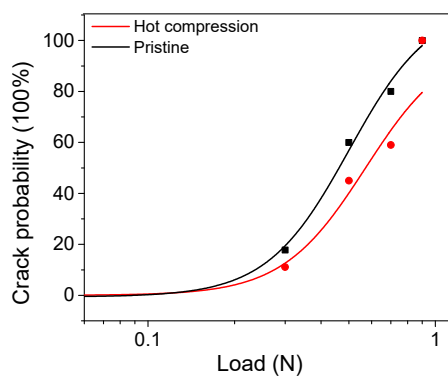

CABS-SiB

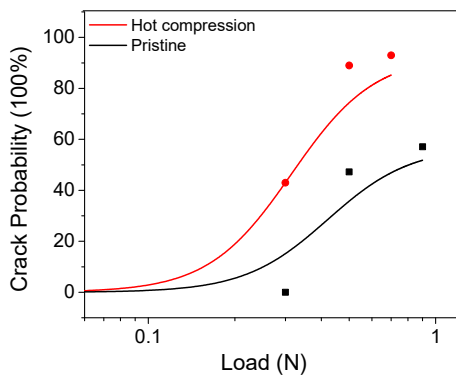

CABS-CaB

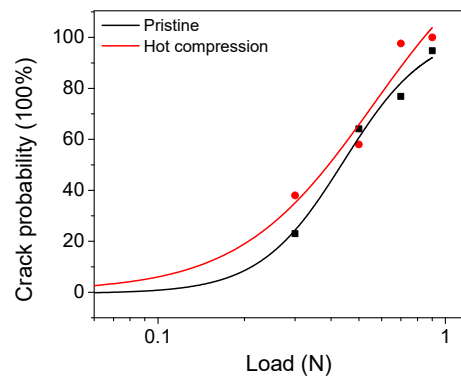

CABS-BAl

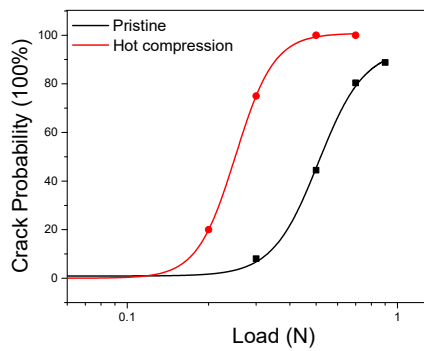

CABS-CaSi

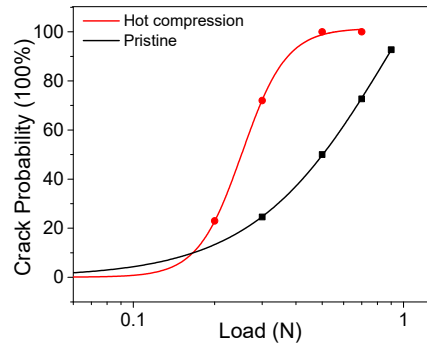

CABS-CaAl

c. CABS (Humid Aging) – Vickers indenter

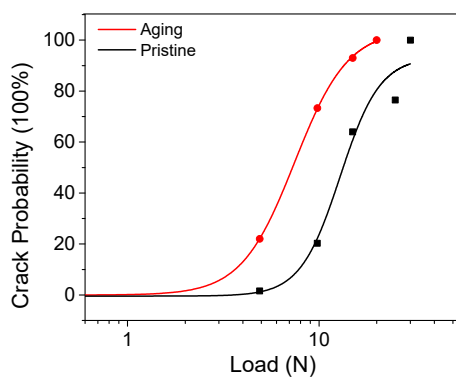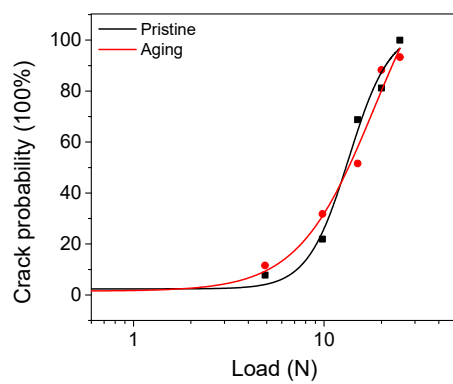

**CABS-ref**

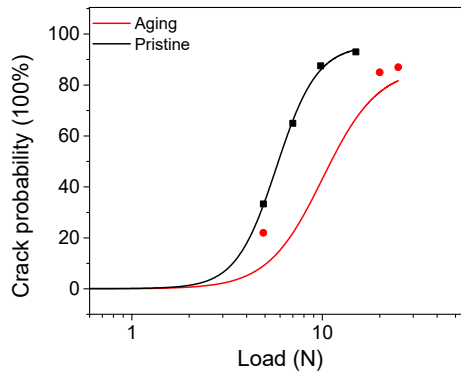

**CABS-SiB**

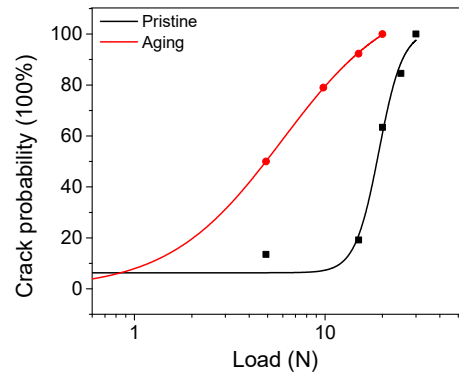

**CABS-CaB**

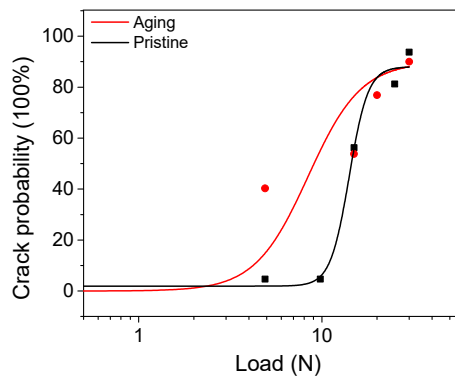

**CABS-BAI**

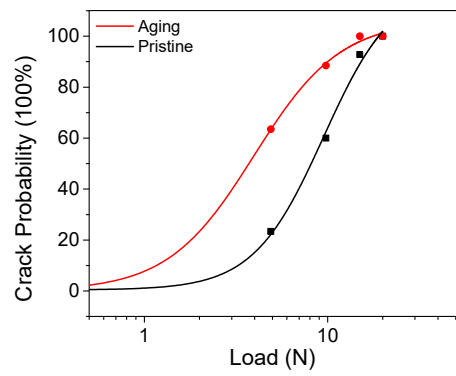

**CABS-CaSi**

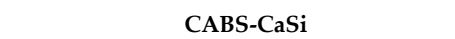

**CABS-CaAl**



d. CABS (Humid Aging) - cube corner indenter

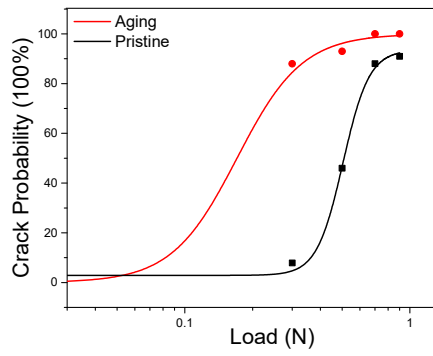

CABS-ref

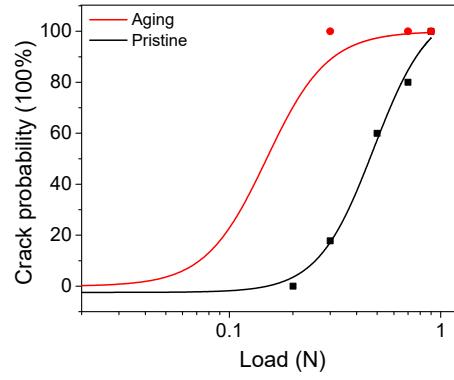

CABS-SiB

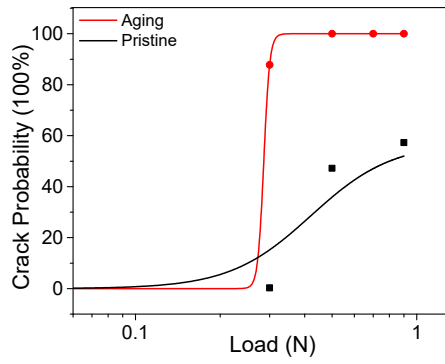

CABS-CaB

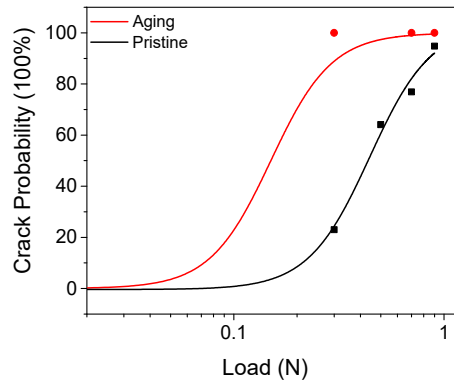

CABS-BAl

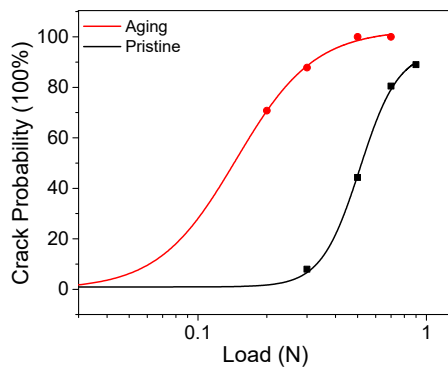

CBAS-CaSi

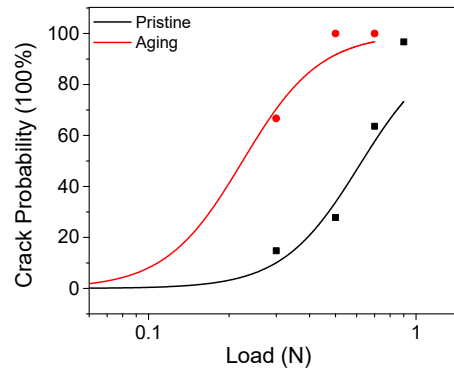

CABS-CaAl

e. CABS (Hot-Aging) – Vickers indenter

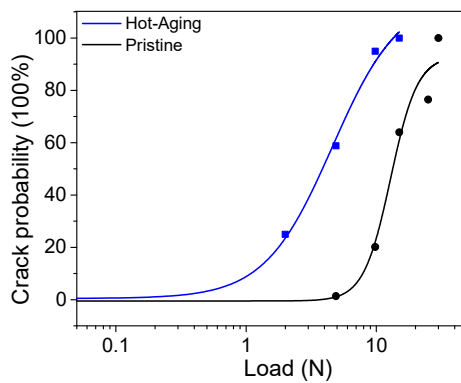

CABS-ref

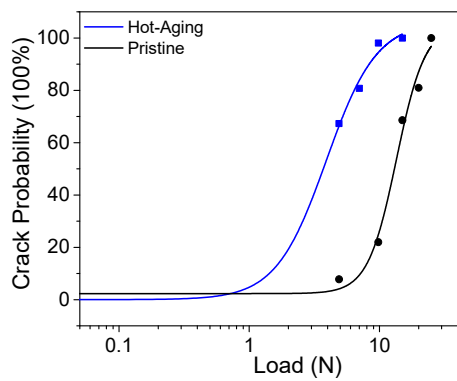

CABS-SiB

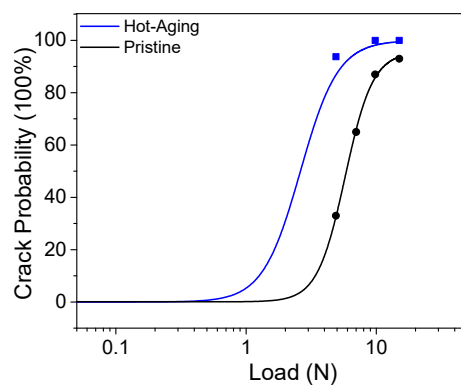

CABS-CaB

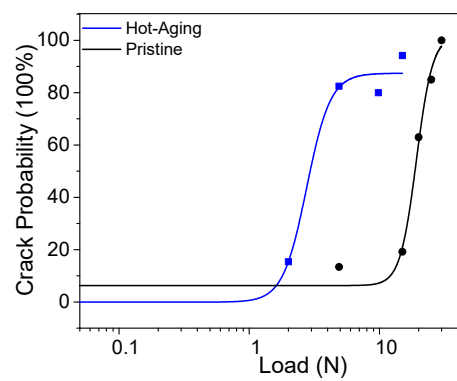

CABS-BAI

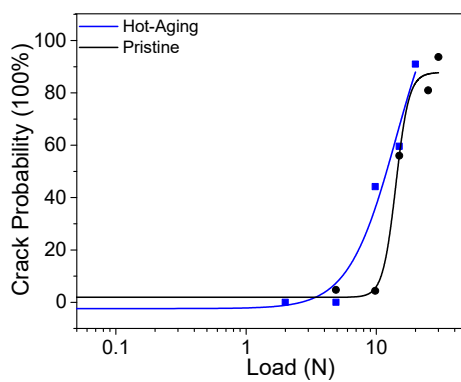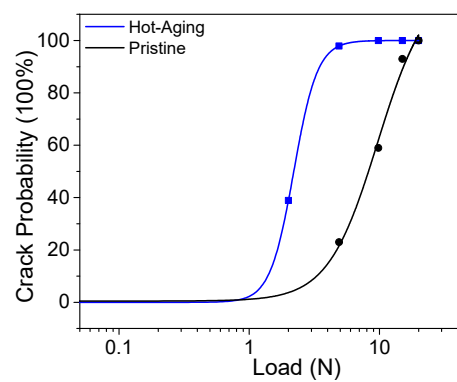

CABS-CaSi

CABS-CaAl

f. CABS (Hot-Aging) – cube corner indenter

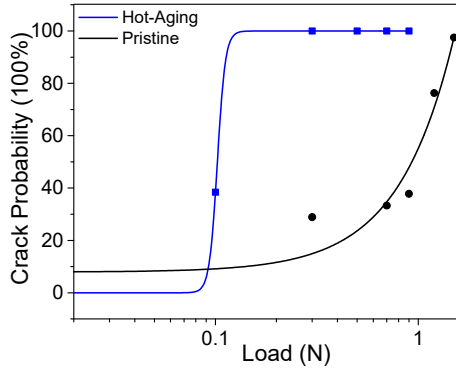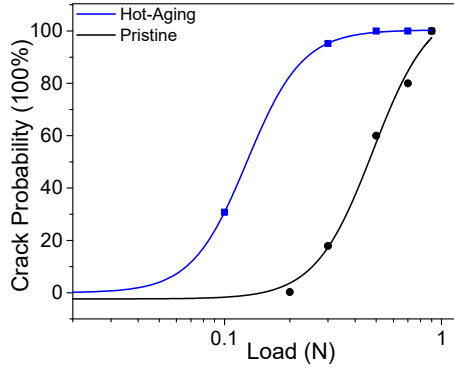

CABS-ref

CABS-SiB

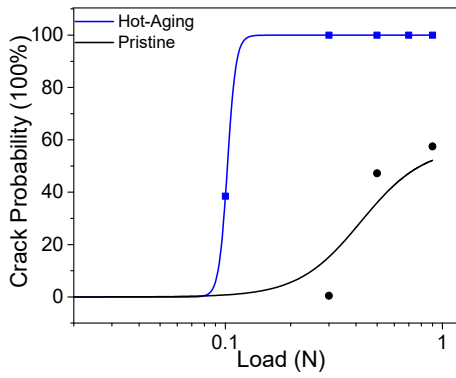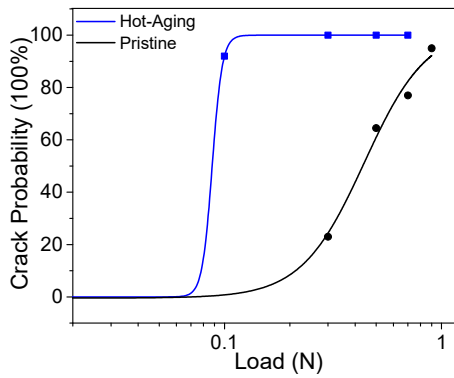

CABS-CaB

CABS-BAl

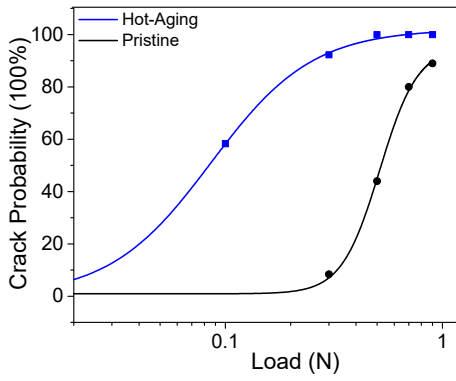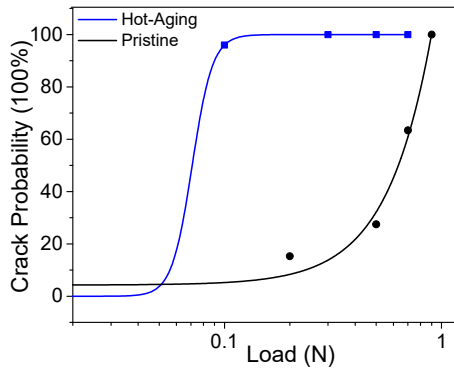

CABS-CaSi

CABS-CaAl

Figure S3. Differential scanning calorimetry heating scans of the calcium aluminoborosilicate (CABS) glasses.

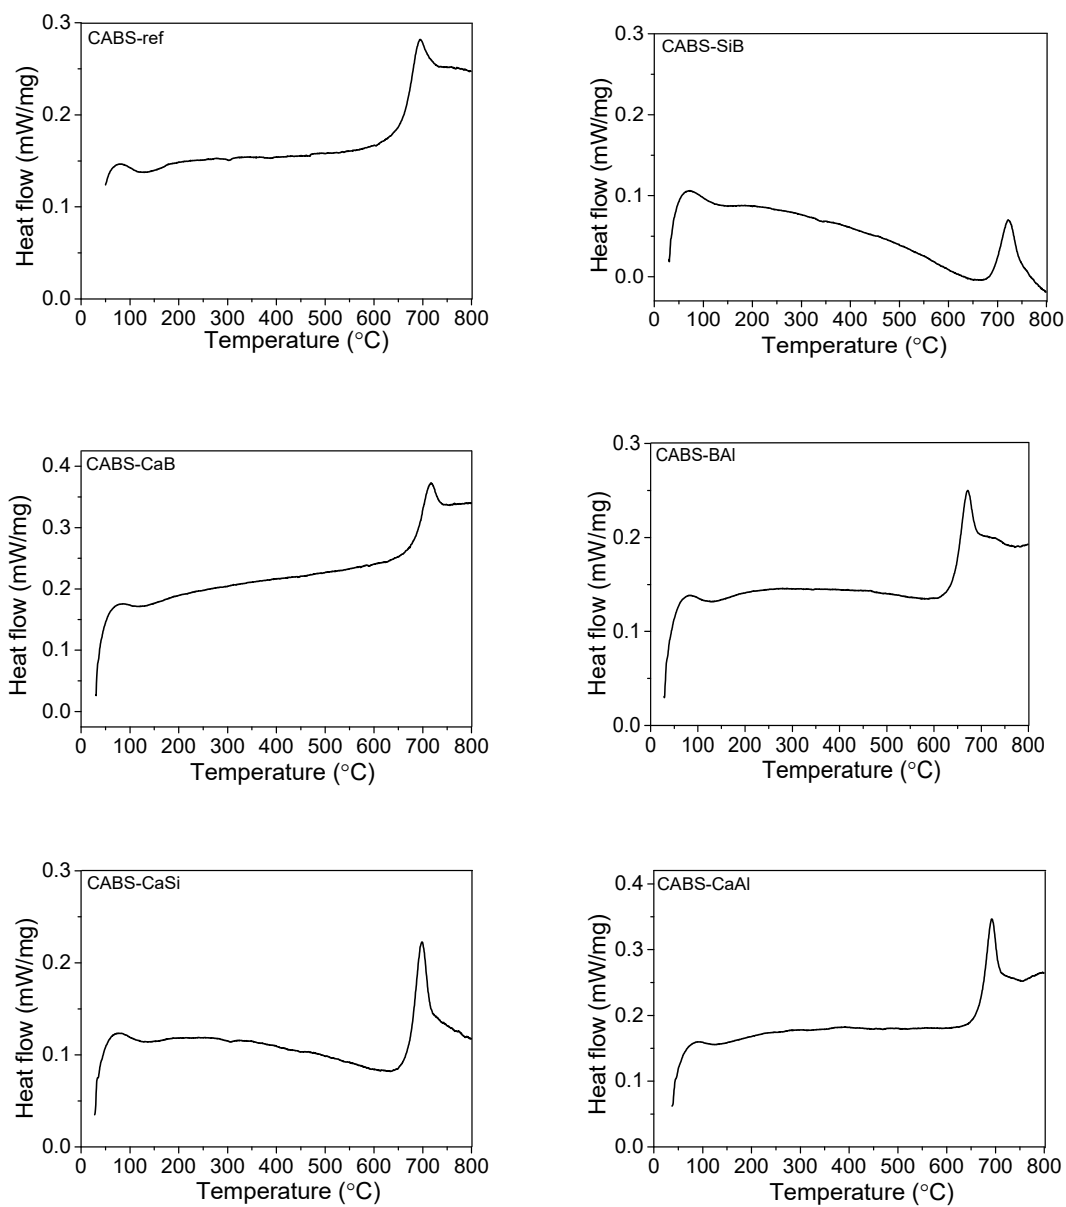

Supplement: s1 [file s1]
